# Supplementary material for: Contrasting response of European forest and grassland energy exchange to heatwaves
Source: Springer Nature journal article supplement (doi:10.1038/ngeo950), 2010-09-05
Supplement: 41561_2010_BFngeo950_MOESM286_ESM.pdf [file 41561_2010_BFngeo950_MOESM286_ESM.pdf]

## **Contrasting response of European forest and grassland energy exchange to heatwaves**

### **Supplementary information**

Teuling et al. (2010)

Title: Supplementary Figures

Summary: Table 1 contains information on the eddy covariance flux tower sites. Figures 1-5 show the atmospheric circulation during heatwave months, the relation between forcing and energy partitioning, the heatwave anomalies, the climatology estimation error, and soil moisture.

**Supplementary Table 1** | List of flux tower sites, site characteristics, and site references for additional site information (see full references on following pages). For the sites without reference we refer to [www.fluxdata.org](http://www.fluxdata.org) for additional information.  $T_{max}$  is the mean summer (JJA) daily maximum temperature excluding heatwave months June–August 2003 and July 2006.

| Abbr.  | Site name                     | Lat.   | Long.  | Elev. (m) | Clim. | IGBP class                  | Years     | $T_{max}$ (°C) | Site reference                                             |
|--------|-------------------------------|--------|--------|-----------|-------|-----------------------------|-----------|----------------|------------------------------------------------------------|
| AT-Neu | Neustift/Stubai Valley        | 47.117 | 11.318 | 970.      | Cfb   | Grassland                   | 2002–2006 | 21.41          | Hammerle et al. (2008)                                     |
| BE-Bra | Brasschaat (De Inslag Forest) | 51.309 | 4.521  | 16.       | Cfb   | Mixed forest                | 1997–2006 | 20.60          | Gielen et al. (2010)                                       |
| BE-Lon | Lonzee                        | 50.552 | 4.745  | 165.      | Cfb   | Cropland                    | 2004–2006 | 21.29          | Moureaux et al. (2006)                                     |
| BE-Vie | Vielsalm                      | 50.306 | 5.997  | 450.      | Cfb   | Mixed forest                | 1996–2006 | 18.89          | Aubinet et al. (2001)                                      |
| CH-Oe1 | Oensingen 1                   | 47.286 | 7.732  | 450.      | Cfb   | Grassland                   | 2002–2006 | 22.49          | Ammann et al. (2007)                                       |
| DE-Bay | Bayreuth-Waldstein            | 50.142 | 11.867 | 775.      | Cfb   | Evergreen needleleaf forest | 1996–1999 | 17.76          | Staudt et al. (2007)                                       |
| DE-Geb | Gebesee                       | 51.100 | 10.914 | 161.      | Cfb   | Cropland                    | 2004–2006 | 22.05          | Anthoni et al. (2004)                                      |
| DE-Gri | Grillenburg                   | 50.950 | 13.513 | 385.      | Cfb   | Grassland                   | 2005–2006 | 20.65          | Gilmanov et al. (2006)                                     |
| DE-Hai | Hainich                       | 51.079 | 10.452 | 430.      | Cfb   | Deciduous broadleaf forest  | 2000–2006 | 19.14          | Kutsch et al. (2010)                                       |
| DE-Har | Hartheim                      | 47.934 | 7.601  | 201.      | Cfb   | Evergreen needleleaf forest | 2005–2006 | 23.58          | Schindler et al. (2006)                                    |
| DE-Kli | Klingenberg                   | 50.893 | 13.523 | 480.      | Cfb   | Cropland                    | 2004–2006 | 19.70          | Prescher et al. (2010)                                     |
| DE-Meh | Mehrstedt 1                   | 51.275 | 10.656 | 286.      | Cfb   | Grassland                   | 2003–2006 | 21.52          | Don et al. (2009)                                          |
| DE-Tha | Tharandt (Anchor Station)     | 50.964 | 13.567 | 380.      | Cfb   | Evergreen needleleaf forest | 1996–2006 | 20.32          | Grünwald et al. (2007)                                     |
| DE-Wet | Wetzstein                     | 50.453 | 11.458 | 785.      | Cfb   | Evergreen needleleaf forest | 2002–2006 | 17.55          | Rebmann et al. (2010)                                      |
| DK-Sor | Soroe (LilleBogeskov)         | 55.487 | 11.646 | 40.       | Cfb   | Deciduous broadleaf forest  | 1996–2006 | 18.75          | Pilegaard et al. (2003)                                    |
| FR-Fon | Fontainebleau                 | 48.476 | 2.780  | 90.       | Cfb   | Deciduous broadleaf forest  | 2005–2006 | 22.29          | see <a href="http://www.fluxdata.org">www.fluxdata.org</a> |
| FR-Gri | Grignon                       | 48.844 | 1.952  | 125.      | Cfb   | Cropland                    | 2005–2006 | 22.77          | Hibbard et al. (2005)                                      |
| FR-Hes | Hesse Forest (Sarrebouurg)    | 48.674 | 7.065  | 300.      | Cfb   | Deciduous broadleaf forest  | 1997–2006 | 21.78          | Granier et al. (2008)                                      |
| FR-LBr | Le Bray                       | 44.717 | −0.769 | 61.       | Cfb   | Evergreen needleleaf forest | 1996–2006 | 24.97          | Berbigier et al. (2001)                                    |
| FR-Lq1 | Laqueuille                    | 45.644 | 2.737  | 1040.     | Cfb   | Grassland                   | 2003–2006 | 18.67          | Allard et al. (2007)                                       |
| FR-Lq2 | Laqueuille extensive          | 45.639 | 2.737  | 1040.     | Cfb   | Grassland                   | 2003–2006 | 18.67          | Allard et al. (2007)                                       |
| IT-Lav | Lavarone                      | 45.955 | 11.281 | 1353.     | Cfb   | Evergreen needleleaf forest | 2000–2006 | 18.37          | Marcolla et al. (2003)                                     |
| IT-MBo | Monte Bondone                 | 46.016 | 11.047 | 1550.     | Cfb   | Grassland                   | 2003–2006 | 16.29          | Gianelle et al. (2009)                                     |
| IT-Mal | Malga Arpaco                  | 46.117 | 11.703 | 1730.     | Cfb   | Grassland                   | 2003–2006 | 15.01          | see <a href="http://www.fluxdata.org">www.fluxdata.org</a> |
| IT-Ren | Renon/Ritten                  | 46.588 | 11.435 | 1730.     | Dfb   | Evergreen needleleaf forest | 1999–2006 | 17.20          | Montagnani et al. (2009)                                   |
| NL-Ca1 | Cabauw1                       | 51.971 | 4.927  | 0.7       | Cfb   | Grassland                   | 2003–2006 | 20.60          | Jacobs et al. (2007)                                       |
| NL-Hor | Horstermeer                   | 52.029 | 5.068  | −2.2      | Cfb   | Grassland                   | 2004–2006 | 22.49          | Jacobs et al. (2007)                                       |
| NL-Loo | Loobos                        | 52.168 | 5.744  | 25.       | Cfb   | Evergreen needleleaf forest | 1996–2006 | 20.58          | Dolman et al. (2002)                                       |
| UK-PL3 | Pang/Lambourne                | 51.45  | −1.267 | 115.      | Cfb   | Deciduous broadleaf forest  | 2005–2006 | 23.02          | see <a href="http://www.fluxdata.org">www.fluxdata.org</a> |
| UK-Ham | Hampshire                     | 51.121 | −0.861 | 80.       | Cfb   | Deciduous broadleaf forest  | 2004–2005 | 20.88          | see <a href="http://www.fluxdata.org">www.fluxdata.org</a> |

**Supplementary Table 1** (cont.) | Full site references.

- Allard, V., et al., The role of grazing management for the net biome productivity and greenhouse gas budget (CO<sub>2</sub>, N<sub>2</sub>O and CH<sub>4</sub>) of semi-natural grassland, *Agr. Ecosyst. Environ.* **121**, 47–58 (2007).
- Ammann, C., Flechard, C.R., Leifeld, J., Neftel, A., & Fuhrer, J., The carbon budget of newly established temperate grassland depends on management intensity, *Agr. Ecosyst. Environ.* **121**, 5–20 (2007).
- Anthoni, P.M., et al., Forest and agricultural land-use-dependent CO<sub>2</sub> exchange in Thuringia, Germany, *Glob. Change Biol.* **10**, 2005–2019 (2004).
- Aubinet, M., Chermanne, B., Vandenhaute, M., Longdoz, B., Yernaux, M., & Laitat, E., Long term carbon dioxide exchange above a mixed forest in the Belgian Ardennes, *Agr. Forest Meteorol.* **108**, 293–315 (2001).
- Berbigier, P., Bonnefond, J.M., & Mellmann, P., CO<sub>2</sub> and water vapour fluxes for 2 years above Euroflux forest site, *Agr. Forest Meteorol.* **108**, 183–197 (2001).
- Dolman, A.J., Moors, E.J., & Elbers, J.A., The carbon uptake of a mid latitude pine forest growing on sandy soil, *Agr. Forest Meteorol.* **111**, 157–170 (2002).
- Don, A., Rebmann, C., Kolle, O., Scherer-Lorenzen, M. & Schulze E.-D., Impact of afforestation-associated management changes on the carbon balance of grassland, *Glob. Change Biol.* **15**, 1990–2002 (2009).
- Gianelle, D., Vescovo, L., Marcolla, B., Manca, G., & Cescatti, A., Ecosystem carbon fluxes and canopy spectral reflectance of a mountain meadow, *Int. J. Remote Sens.* **30**(2), 435–449 (2009).
- Gielen, B., Verbeeck, H., Neiryck, J., Sampson, D.A., Vermeiren, F., & Janssens, I.A., Decadal water balance of a temperate Scots pine forest (*Pinus sylvestris* L.) based on measurements and modelling, *Biogeosciences* **7**, 1247–1261 (2010).
- Gilmanov, T.G., et al., Partitioning European grassland net ecosystem CO<sub>2</sub> exchange into gross primary productivity and ecosystem respiration using light response function analysis, *Agr. Ecosyst. Environ.* **121**, 93–120 (2006).
- Granier, A., Breda, N., Longdoz, B., Gross, P., & Ngao, J., Ten years of fluxes and stand growth in a young beech forest at Hesse, North-eastern France, *Ann. For. Sci.* **65**(7), 704, doi:10.1051/forest:2008052 (2008).
- Grünwald, T., & Bernhofer, Ch., A decade of carbon, water and energy flux measurements of an old spruce forest at the Anchor Station Tharandt, *Tellus* **59B**, 387–396 (2007).
- Hammerle, A., Haslwanter, A., Tappeiner, U., Cernusca, A., & Wohlfahrt G., Leaf area controls on energy partitioning of a temperate mountain grassland, *Biogeosciences* **5**, 421–431 (2008).
- Hibbard, K.A., Law, B.E., Reichstein, M., & Sulzman, J., An analysis of soil respiration across northern hemisphere temperate ecosystems, *Biogeochemistry* **73**, 29–70 (2005).
- Jacobs, C.M.J., et al., Variability of annual CO<sub>2</sub> exchange from Dutch grasslands, *Biogeosciences* **4**, 803–816 (2007).
- Kutsch, W.L., Persson, T., Schrumpf, M., Moyano, F.E., Mund, M., Andersson, S., & Schulze E.-D., Heterotrophic soil respiration and soil carbon dynamics in the deciduous Hainich forest obtained by three approaches, *Biogeochemistry*, doi:10.1007/s10533-010-9414-9 (2010).
- Marcolla, A., Pitacco, A., & Cescatti, A., Canopy architecture and turbulence structure in a coniferous forest, *Bound.-Lay. Meteorol.* **108**, 39–59 (2003).
- Montagnani, L., Manca, G., Canepa, E., Georgieva, E., Acosta, M., Feigenwinter, C., Janous, D., Kerschbaumer, G., Lindroth, A., Minach, L., Minerbi, S., Mölder, M., Pavelka, M., Seufert, G., Zeri, M., & Ziegler, W., A new mass conservation approach to the study of CO<sub>2</sub> advection in an alpine forest, *J. Geophys. Res.* **114**, D07306, doi:10.1029/2008JD010650 (2009).
- Moureaux, C., Debacq, A., Bodson, B., Heinesch, B., & Aubinet, M., Annual net ecosystem carbon exchange by a sugar beet crop, *Agr. Forest Meteorol.* **139**, 25–39 (2006).
- Pilegaard, K., Mikkelsen, T.N., Beier, C., Jensen, N.O., Ambus, P., & Ro-Poulsen, H., Field measurements of atmosphere-biosphere interactions in a Danish beech forest, *Boreal Environ. Res.* **8**, 315–333 (2003).
- Prescher, A.-K., Grünwald, T., & Bernhofer, Ch., Land use regulates carbon budgets in eastern Germany: from NEE to NBP, *Agr. Forest Meteorol.* **150**, 1016–1025, doi:10.1016/j.agrformet.2010.03.008 (2010).
- Rebmann, C., Zeri, M., Lasslop, G., Mund, M., Kolle, O., Schulze, E.-D., & Feigenwinter, Ch., Treatment and assessment of the CO<sub>2</sub>-exchange at a complex forest site in Thuringia, Germany, *Agr. Forest Meteorol.* **150**, 684–691, doi:10.1016/j.agrformet.2009.11.001 (2010).

Schindler, D., Turk, M., & Mayer, H., CO<sub>2</sub> fluxes of a Scots pine forest growing in the warm and dry southern upper Rhine plain, SW Germany, *Eur. J. Forest Res.* **125**, 201–212 (2006).

Staudt, K., & Foken, T., Documentation of reference data for the experimental areas of the Bayreuth Center for Ecology and Environmental Research (BayCEER) at the Waldstein site, in: *Arb. Ergebnisse No. 35*, Dep. Micrometeorol., University of Bayreuth (2007).

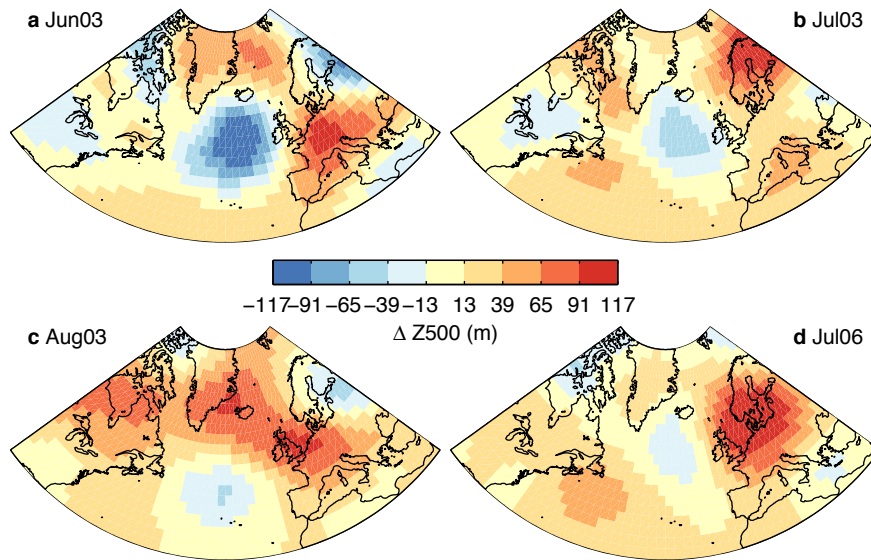

**Supplementary Figure 1** | Distribution of the monthly average 500 hPa height anomaly (Z500) with respect to the climatology over the years 1948–2002. **a**, June 2003. **b**, July 2003. **c**, August 2003. **d**, July 2006. Data come from the NCEP/NCAR Reanalysis and have been obtained from the Climate Explorer ([climexp.knmi.nl](http://climexp.knmi.nl)). The atmospheric circulation regime in June 2003 is dominated by a deep anomalous trough covering the North Atlantic, while heatwave conditions in July and August 2003 and July 2006 were caused by an Omega Blocking situation with an extensive high located over Northern Europe.

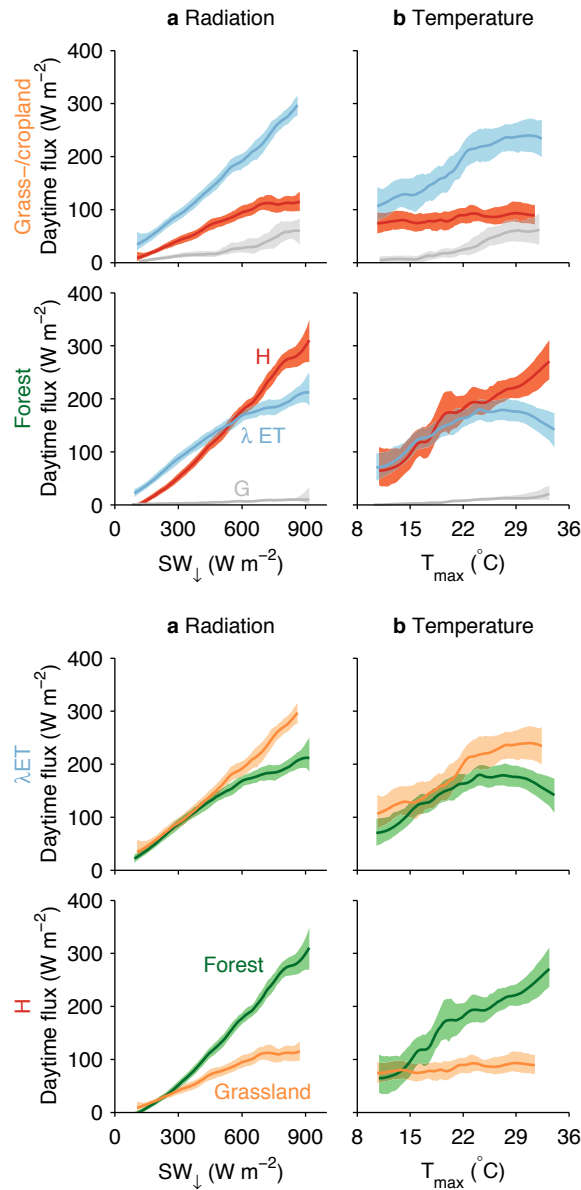

**Supplementary Figure 2** | Functional relationships between midday surface fluxes of sensible heat (H), latent heat ( $\lambda$ ET), and ground heat (G) and environmental conditions. **a**, Incoming shortwave radiation ( $SW_{\downarrow}$ ). **b**, Daily maximum air temperature ( $T_{\max}$ , see Supplementary Table 1 for non-heatwave site averages). Curves have been derived using locally weighted polynomial regression (LOESS) on all midday data (9:00–13:00 UTC, heatwave days included) in the months June–August for all sites. Uncertainty bounds reflect 5% and 95% percentiles of the LOESS regression as determined by bootstrapping. The upper plot displays the relations per land use type separately; in the lower plot the relations are shown for H and  $\lambda$ ET separately. Relationships with radiation are stronger than with temperature as indicated by the smaller uncertainty bounds. Note that grassland and forest have different maxima in their  $T, \lambda$ ET-relationships, with forest becoming temperature limited at lower temperatures. The sensible heat flux over grassland shows no clear relation with temperature over the observed range of temperatures, whereas it strongly increases with temperature over forest.

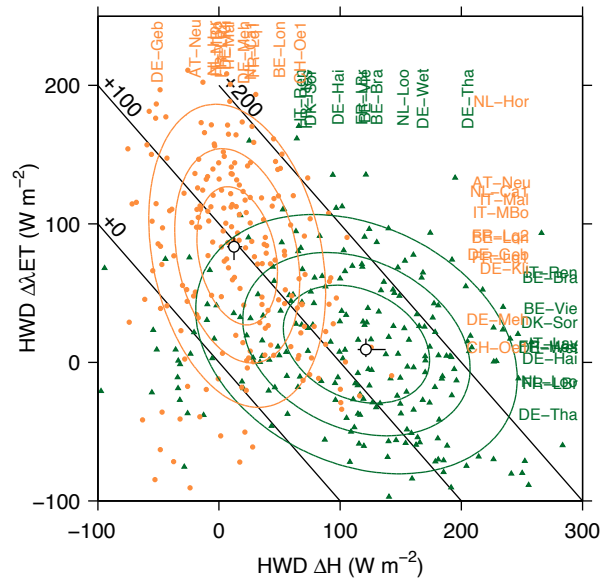

**Supplementary Figure 3** | Relation between heatwave day (HWD) anomalies of sensible (H) and latent ( $\lambda$ ET) heat flux for forest (triangles) and grass-/cropland (circles) sites. Lines indicate levels of available energy. Site abbreviations indicate the HWD medians. The single-component Gaussian density contours reveal a distinct clustering between forest and grass-/cropland sites.

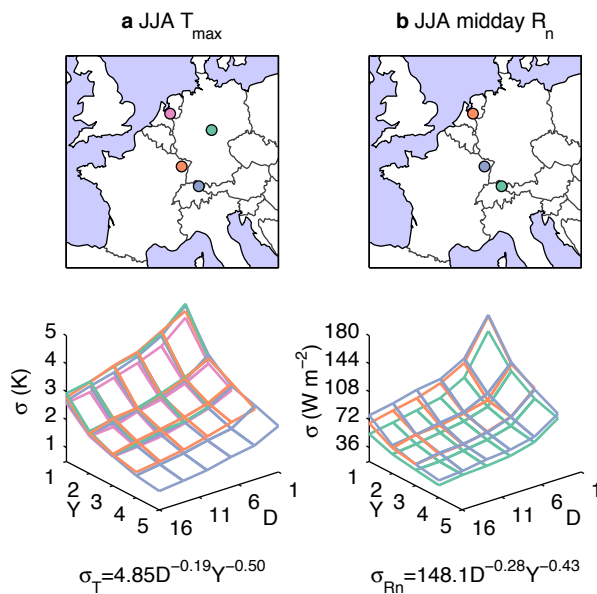

**Supplementary Figure 4** | Reduction in uncertainty of the estimated summer (June–August) climatology as a function of the number of days (D) and the number of years (Y) of the averaging period as determined by the random combination method. Data are taken from flux tower sites with the longest continuous records (Hainich, Hesse Forest, Loobos) and the Rietholzbach experimental site in Switzerland ([www.iac.ethz.ch/url/rietholzbach](http://www.iac.ethz.ch/url/rietholzbach)). Note that the exponents will converge to  $-0.50$  for uncorrelated data. The strong temporal autocorrelation makes it more effective to increase the number of years to reduce the uncertainty than increasing the number of days around the day of interest (roughly by a factor 3). For temperature, estimating the climatology from 5 years of data and using a 15-day window reduces the uncertainty by 73% of the interannual variability of daily temperature. For fluxes, which have a lower temporal autocorrelation, this reduction is 77%. Here we use at least 2 years of data and a 15-day window, corresponding to minimum reductions of 58% and 65%, respectively.



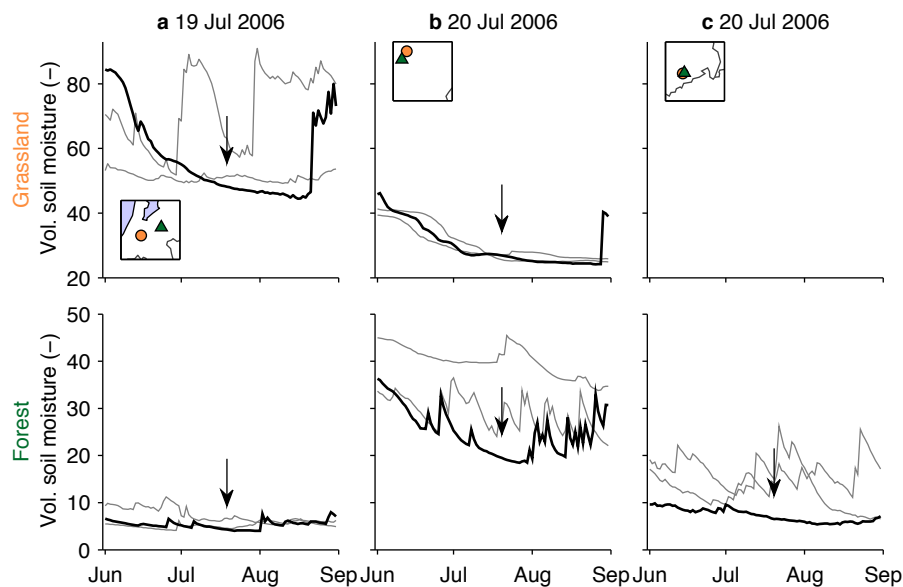

**Supplementary Figure 5** | Observed summer soil moisture evolution for the site pairs shown in Figure 2. **a**, Cabauw and Loobos (distance 60 km). **b**, Mehrstedt and Hainich (distance 26 km). **c**, Grillenburg and Tharandt (distance 4 km). Thick lines indicate observations for the year 2006, grey lines show observations for 2004 and 2005 as reference. Arrows indicate the dates. Soil moisture observations are made at approximately 30 cm depth using Time Domain Reflectometry. Note that soil moisture levels at the peak of the 2006 heatwave were not necessary below 2004 and 2005 levels for the forest sites that show a large increase in sensible heat flux. No soil moisture observations are available for Grillenburg. The plots also illustrate the difficulty when comparing soil moisture across sites: volumetric soil moisture values can be in completely different ranges due to differences in soil texture, and the measurements represent only a small part of the total volume of soil over which plants take up their water. Moreover, the uptake of plants is a dynamic process and might not be represented well by measurements at a single depth.
